# Supplementary material for: Microbial Communities in Ferromanganese Sediments from the Northern Basin of Lake Baikal (Russia)
Source: MDPI journal article supplement (doi:10.3390/microorganisms11071865), 2023-07-24
Supplement: s1 [file s1]

**Table S1.** Number of reads, OTUs and indices of species hidden richness and evenness in the non-rarefied libraries of bacterial and archaeal 16S rRNA gene fragments (for a cluster distance of 0.03).

|                | <b>Sediment<br/>layers, cmblf</b> | <b>Reads<br/>Bacteria/Archaea</b> | <b>OTU<sub>0.03</sub><br/>Bacteria/Archaea</b> | <b>ACE<br/>Bacteria/Archaea</b> | <b>Chao1<br/>Bacteria/Archaea</b> | <b>Shannon<br/>Bacteria/Archaea</b> | <b>Invers Simpso<br/>Bacteria/Archaea</b> |
|----------------|-----------------------------------|-----------------------------------|------------------------------------------------|---------------------------------|-----------------------------------|-------------------------------------|-------------------------------------------|
| <b>St6Grf4</b> | 0-5                               | 1397/66385                        | 454/316                                        | 808.2/356.7                     | 738.5/373.2                       | 5.39/2.22                           | 96.67/4.58                                |
|                | 10-11                             | 11820/49467                       | 1022/273                                       | 1192.3/348.7                    | 1190.3/336.7                      | 5.72/2.11                           | 110.83/4.31                               |
|                | 12-13_FeMn_L                      | 12683/63670                       | 981/311                                        | 1174.6/135                      | 1175.8/359.9                      | 5.24/2.44                           | 33.65/5.33                                |
|                | 22-23                             | 14689/34121                       | 886/275                                        | 1081.5/355.4                    | 1089.4/310.7                      | 5.07/2.51                           | 49.17/3.75                                |
|                | 23-24_FeMn_L                      | 13921/33801                       | 823/181                                        | 1032.8/306.9                    | 1058/238.4                        | 5.11/0.8                            | 53.34/1.31                                |
|                | 24-25                             | 13594/56584                       | 686/257                                        | 777.4/210.8                     | 805.2/288.3                       | 4.99/2.91                           | 45.90/9.54                                |
|                | 29-30                             | 4104/48617                        | 413/261                                        | 793.8/276.7                     | 709.2/295.1                       | 4.41/2.58                           | 31.55/7.03                                |
| <b>St7Grf6</b> | 0-5                               | 9084/35317                        | 917/268                                        | 1020.4/316.6                    | 1031.9/322.5                      | 5.77/1.76                           | 112.98/2.82                               |
|                | 6-7_FeMn_L                        | 5198/59369                        | 813/260                                        | 1103.8/349.7                    | 1054.8/422.2                      | 5.65/2.04                           | 110.58/4.04                               |
|                | 15-16                             | 1525/15974                        | 103/214                                        | 126.8/276.1                     | 125.2/268.0                       | 3.35/2.49                           | 14.37/4.39                                |
|                | 19-20                             | 23903/0                           | 534/0                                          | 695.4/0                         | 687.4/0                           | 3.33/0                              | 9.75/0                                    |
|                | 20-21_FeMn_L                      | 26328/19215                       | 452/274                                        | 631.9/300.6                     | 658.9/299.4                       | 3.65/3.01                           | 15.73/7.31                                |
|                | 25-26                             | 8910/9225                         | 318/181                                        | 414.3/213.5                     | 419.3/216.9                       | 3.44/2.8                            | 10.85/5.95                                |

**Table S2. General features of the of the 37 Lake Baikal MAGs.**

| Phylum/class            | GC Content (%) | Completeness | Contamination | ANI   | Estimated genome size (Mp) | Taxonomic affiliation of MAGs (GTDB, referenced groups) | Origin of closest organism (source or reference)                                                           |
|-------------------------|----------------|--------------|---------------|-------|----------------------------|---------------------------------------------------------|------------------------------------------------------------------------------------------------------------|
| Actinobacteriota-c8     | 55.75          | 100          | 0             | 82.22 | 2.58                       | Actinobacteria bacterium                                | Deep terrestrial subsurface fluid (GCA_003599235.1)                                                        |
| Actinobacteriota-c11    | 69.29          | 71.45        | 0.84          | -     | 2.49                       | <i>Actinobacteriota</i>                                 | N/A <sup>1</sup>                                                                                           |
| Gammaproteobacteria-c58 | 59.03          | 99.15        | 0.64          | 87.21 | 3.78                       | <i>Azonexus</i> sp.                                     | GCA_016705475.1                                                                                            |
| Gammaproteobacteria-m2  | 56.16          | 75.06        | 0.43          | -     | 2.23                       | <i>Burkholderiales</i>                                  | N/A                                                                                                        |
| Gammaproteobacteria-m43 | 43.55          | 68.94        | 2.08          | 80.03 | 3.6                        | <i>Methylothermus</i> sp.                               | Lake Baikal (GCA_009693255.1)                                                                              |
| Gammaproteobacteria-m15 | 64.65          | 54.34        | 1.95          | 80.56 | 4.6                        | Betaproteobacteria bacterium                            | Environmental aquatic freshwater lotic sediment (GCA_001771935.1)                                          |
| Gammaproteobacteria-c3  | 62.92          | 53.03        | 9.32          | -     | 4.73                       | <i>Burkholderiales</i>                                  | N/A                                                                                                        |
| Gammaproteobacteria-c38 | 62.61          | 57.85        | 5.68          | 81.78 | 4.79                       | <i>Rhodospirillum rubrum</i>                            | Sao Paulo Zoo's Lake water (GCF_006974105.1)                                                               |
| Desulfobacteriota-c66   | 54.35          | 91.98        | 7.89          | 79.96 | 5.28                       | Desulfuromonadales bacterium                            | Siberian coastal permafrost (GCA_016650295.1)                                                              |
| Desulfobacteriota-m70   | 39.32          | 82.52        | 0.16          | -     | 3.29                       | <i>Desulfobacterota</i>                                 | N/A                                                                                                        |
| Desulfobacteriota-m4    | 56.04          | 74.6         | 1.52          | 82.9  | 3.33                       | <i>Geobacter</i> sp.                                    | Lake Hazen, Arctic (GCA_009886055.1)                                                                       |
| Desulfobacteriota-c44   | 65.04          | 60.65        | 0.43          | 90.78 | 4.28                       | Deltaproteobacteria bacterium                           | GCA_011391555.1                                                                                            |
| Desulfobacteriota-m16   | 67.42          | 50.86        | 10.84         | 90.7  | 2.42                       | Deltaproteobacteria bacterium                           | GCA_011391555.1                                                                                            |
| Planctomycetota-m12     | 52.06          | 83.89        | 10.48         | 93.26 | 2.8                        | Planctomycetes bacterium ( <i>Brocadiales</i> )         | Rifle well FP-101 under high O <sub>2</sub> conditions (GCA_001828545.1)                                   |
| Planctomycetota-c67     | 41.99          | 82.44        | 4.35          | 79.99 | 2.87                       | Planctomycetes bacterium                                | Groundwater planktonic microbiome (GCA_016198835.1)                                                        |
| Nitrospirota-c4         | 61.35          | 70.85        | 8.23          | -     | 9.54                       | <i>Nitrospirales</i>                                    | N/A                                                                                                        |
| Nitrospirota-m35        | 63.26          | 63.3         | 8.62          | 91.95 | 5.53                       | Nitrospirae bacterium                                   | Soil sample from Angelo meadow plot 2; 20cm depth; 2 days after second rain event (91mm) (GCA_001914955.1) |
| Nitrospirota-m41        | 61.62          | 58.78        | 3.45          | 92.78 | 3.63                       | Nitrospiraceae bacterium                                | Lake Baikal water (GCA_009692155.1)                                                                        |
| Chloroflexota-c76       | 62.89          | 73.09        | 2.01          | 75.71 | 2.71                       | Anaerolineae bacterium                                  | Marine sediments (GCA_011192015.1)                                                                         |
| Bacteroidota-m24        | 35             | 67.24        | 3.45          | -     | 4.91                       | <i>Bacteroidetes</i>                                    | N/A                                                                                                        |
| Bacteroidota-c69        | 38.91          | 58.8         | 0.51          | 88.65 | 3.88                       | <i>Sediminibacterium</i>                                | Mine wastewater (GCA_002256765.1)                                                                          |

|                       |       |       |       |       |      |                                                         |                                                                                      |
|-----------------------|-------|-------|-------|-------|------|---------------------------------------------------------|--------------------------------------------------------------------------------------|
| Methylomirabilota-m34 | 69.83 | 93.97 | 5.9   | 81.93 | 2.45 | Candidate division NC10 bacterium                       | Groundwater sites across Northern California (GCA_016180705.1)                       |
| Methylomirabilota-m11 | 60.01 | 81.27 | 0.16  | 87.39 | 4.08 | <i>Ca. Methylomirabilis limnetica</i>                   | Bioreactor (GCF_003044035.1)                                                         |
| Methylomirabilota-m8  | 66.06 | 71.47 | 0     | 84.45 | 3.58 | <i>Ca. Rokubacteria bacterium</i>                       | Groundwater planktonic microbiome (GCA_016201645.1)                                  |
| Methylomirabilota-m62 | 65.35 | 71.42 | 2.62  | 84.79 | 5.84 | Candidate division NC10 bacterium                       | Hydrothermal vent sediments and freshwater spring sediments (GCA_011054645.1)        |
| Methylomirabilota-c71 | 62.7  | 62.9  | 5.33  | -     | 5.87 | <i>Methylomirabilota</i>                                | N/A                                                                                  |
| Methylomirabilota-c9  | 68.39 | 58.14 | 4.98  | 89.41 | 4.8  | <i>Ca. Rokubacteria bacterium</i>                       | Sediment at 5m depth (GCA_001443385.1)                                               |
| Deinococcota-m54      | 62.33 | 63.13 | 10.14 | -     | 5.73 | <i>Deinococcota</i>                                     | N/A                                                                                  |
| Elusimicrobiota-c55   | 64.2  | 94.83 | 0     | 84.74 | 4.37 | Elusimicrobia bacterium                                 | Groundwater sites across Northern California (GCA_016182905.1)                       |
| Patescibacteria-c49   | 40.99 | 63.87 | 0.69  | -     | 3.33 | <i>Curtissbacterales</i>                                | N/A                                                                                  |
| Acidobacteriota-m10   | 55.32 | 80.37 | 5.16  | 79.32 | 5.53 | <i>Chloracidobacterium</i> sp.                          | GCA_002427845.1                                                                      |
| Acidobacteriota-m40   | 65.26 | 62.08 | 8.36  | 76.97 | 3.51 | Acidobacteria bacterium                                 | Soil samples from a meadow in the Angelo Coastal Range Reserve, CA (GCA_003222385.1) |
| Bacteria-c16          | 56.5  | 69.36 | 5.49  | 76.57 | 8.62 | - <sup>2</sup>                                          | Freshwater recirculating aquaculture system biofilter (GCF_001458735.1)              |
| Bacteria-m33          | 44.2  | 53.61 | 1.88  | -     | 4.86 | -                                                       | N/A                                                                                  |
| Crenarchaeota-m3      | 34.6  | 90.93 | 3.44  | 79.02 | 1.54 | Thaumarchaeota archaeon<br>( <i>Nitrosopumilaceae</i> ) | Sediment at 5m depth (GCA_001443365.1)                                               |
| Halobacterota-c31     | 45.38 | 89.16 | 1.6   | 96.51 | 2.27 | <i>Ca. Methanoperedens</i> sp                           | GCA_902386255.1                                                                      |
| Thermoplasmatota-c23  | 55.38 | 99.07 | 3.5   | 79.93 | 2.07 | Thermoplasmatota archaeon                               | Crystalline bedrock of the Fennoscandian Shield (GCA_001800815.1)                    |

<sup>1</sup> N/A – not classified

<sup>2</sup> - – not data
